# Supplementary material for: Insights into the genus Diaporthe: phylogenetic species delimitation in the D. eres species complex
Source: Springer Nature journal article supplement (doi:10.1007/s13225-014-0297-2), 2014-07-01
Supplement: 13225_2014_297_MOESM1_ESM.pdf [file 13225_2014_297_MOESM1_ESM.pdf]

**Supplementary Table 1** Additional selection of isolates used to test Apn2 primers and GenBank Accessions

| Species                        | Isolate/culture collection | Host                         | Country  | Collector                | GenBank Accession of Apn2 gene |
|--------------------------------|----------------------------|------------------------------|----------|--------------------------|--------------------------------|
| <i>D. angelicae</i>            | CBS 111592                 | <i>Heracleum sphondylium</i> | Austria  | W. Jaklitsch             | KM016684                       |
| <i>D. batatas</i>              | CBS 122.21                 | <i>Ipomoea batatas</i>       | USA:NJ   | L.H. Harter              | KM016677                       |
| <i>D. citriasiana</i>          | CBS 134240                 | <i>Citrus unshiu</i>         | China    | F. Huang                 | KM016681                       |
| <i>D. convolvuli</i>           | FAU649                     | <i>Convolvulus arvensis</i>  | Canada   | J. Ormeno-Nunez          | KM016674                       |
| <i>D. cytospora</i>            | FAU461/CBS 137020          | <i>Citrus limon</i>          | Spain    | M. Palm                  | KM016678                       |
| <i>D. foeniculina</i>          | DP0391/CBS 111553          | <i>Foeniculum vulgare</i>    | Portugal | A. Phillips              | KM016679                       |
| <i>D. helianthi</i>            | CBS 592.81                 | <i>Helianthus annuus</i>     | Serbia   | M. Muntañola-Cvetkovic   | KM016689                       |
| <i>D. longicolla</i>           | FAU599/ATCC60325           | <i>Glycine max</i>           | USA:OH   | T.W. Hobbs               | KM016676                       |
| <i>D. lucitanicae</i>          | CBS 123212                 | <i>Foeniculum vulgare</i>    | Portugal | J.M. Santos              | KM016694                       |
| <i>D. melonis</i>              | CBS 507.78                 | <i>Cucumis melo</i>          | USA:TX   | L. Beraha & M.J. O'Brien | KM016680                       |
| <i>D. neoarctii</i>            | CBS 109490                 | <i>Ambrosia trifida</i>      | USA:NJ   | G. Bills                 | KM016683                       |
| <i>D. novem</i>                | CBS 127270                 | <i>Glycine max</i>           | Croatia  | T. Duvnjak               | KM016691                       |
| <i>D. perijuncta</i>           | CBS 109745                 | <i>Ulmus glabra</i>          | Austria  | W. Jaklitsch             | KM016687                       |
| <i>D. pterocarpicola</i>       | DPH013/CBS 135432          | <i>Pterocarpus indicus</i>   | Thailand | D. Udayanga              | KM016685                       |
| <i>D. rudis</i>                | AR3422/CBS 109292          | <i>Laburnum anagyroides</i>  | Austria  | W. Jaklitsch             | KM016686                       |
| <i>D. thunbergii</i>           | DPH008                     | <i>Thunbergia laurifolia</i> | Thailand | D. Udayanga              | KM016688                       |
| <i>Diaporthe</i> sp. 1         | AR3602                     | <i>Cucumis melo</i>          | Japan    | T. Kobayashi             | KM016673                       |
| <i>Diaporthe</i> sp. 2         | FAU635                     | <i>Glycine max</i>           | USA:OH   | F.A. Uecker              | KM016675                       |
| <i>Diaporthe</i> sp. 3         | FAU656                     | <i>Cucumis melo</i>          | USA:OK   | unknown                  | KM016690                       |
| <i>Diaporthe</i> sp. 4         | DP0482                     | <i>Arctium lappa</i>         | Austria  | W. Jaklitsch             | KM016682                       |
| <i>Mazzantia galii</i>         | AR4658/ CBS 125529         | <i>Galium aparine</i>        | France   | A. Gardiennet            | KM016693                       |
| <i>Ophiidiaporthe cyatheae</i> | AR5192                     | <i>Cyathea lepifera</i>      | Taiwan   | C.H. Fu                  | KM016692                       |

**ESM 1** Udayanga D, Castlebury LA, Rossman AY, Cukeatirote E & Hyde KD (2014) Insights in to the genus *Diaporthe*: Phylogenetic species delimitation in the *D. eres* species complex. Fungal Diversity, FUDI-D-14-00090.

**Table 1: Isolates and sequences used in this study (Udayanga et al. 2014) Fungal Diversity**

| Species                  | Isolate/culture collection | Host                         | Host family          | Location    | Collector       | GenBank Accessions |          |          |               |          |          |          |          |
|--------------------------|----------------------------|------------------------------|----------------------|-------------|-----------------|--------------------|----------|----------|---------------|----------|----------|----------|----------|
|                          |                            |                              |                      |             |                 | ACT                | Apn2     | CAL      | EF1- $\alpha$ | FG1093   | HIS      | ITS      | TUB      |
| <i>D. alleghaniensis</i> | CBS 495.72                 | <i>Betula alleghaniensis</i> | <i>Betulaceae</i>    | Canada      | R. H. Arnold    | JQ807299           | KJ380963 | KC343249 | GQ250298      | KJ381045 | KC343491 | FJ889444 | KC843228 |
| <i>D. alnea</i>          | CBS 146.46                 | <i>Alnus</i> sp.             | <i>Betulaceae</i>    | Netherlands | S. Truter       | KJ420774           | KJ380969 | KC343250 | KC343734      | KJ381037 | KC343492 | KC343008 | KC343976 |
|                          | CBS 159.47                 | <i>Alnus</i> sp.             | <i>Betulaceae</i>    | Netherlands | S. Truter       | KJ420775           | KJ380970 | KC343251 | KC343735      | KJ381038 | KC343493 | KC343009 | KC343977 |
|                          | LCM22b.02a                 | <i>Alnus</i> sp.             | <i>Betulaceae</i>    | USA         | L. Mejia        | KJ420776           | KJ380971 | KJ435020 | KJ210557      | KJ381039 | KJ420883 | KJ210535 | KJ420825 |
|                          | LCM22b.02b                 | <i>Alnus</i> sp.             | <i>Betulaceae</i>    | USA         | L. Mejia        | KJ420777           | KJ380972 | KJ435021 | KJ210558      | KJ381040 | KJ420884 | KJ210536 | KJ420826 |
| <i>D. bicincta</i>       | DP0659 = CBS 121004        | <i>Juglans</i> sp.           | <i>Juglandaceae</i>  | USA         | A.Y. Rossman    | KJ420771           | KJ380976 | KC343376 | KC343860      | KJ381042 | KC343618 | KC343134 | KC344102 |
| <i>D. celastrina</i>     | CBS 139.27                 | <i>Celastrus</i> sp.         | <i>Celastraceae</i>  | USA         | L. E. Wehmeyer  | KJ420769           | KJ380974 | KC343289 | KC343773      | KJ381041 | KC343531 | KC343047 | KC344015 |
| <i>D. ctri</i>           | AR3405                     | <i>Citrus</i> sp.            | <i>Rutaceae</i>      | USA         | L. W. Timmer    | KC843234           | KJ380981 | KC843157 | KC843071      | KJ381049 | KJ420881 | KC843311 | KC843187 |
| <i>D. citrichinensis</i> | ZJUD034A= CBS 134242       | <i>Citrus</i> sp.            | <i>Rutaceae</i>      | China       | F. Huang        | KJ420779           | KJ380980 | KC843234 | KC843071      | KJ381048 | KJ420880 | KC843311 | KC843187 |
|                          | ZJUD034B =M1040            | <i>Citrus</i> sp.            | <i>Rutaceae</i>      | China       | F. Huang        | KJ420778           | KJ380979 | KJ435042 | KJ210562      | KJ381047 | KJ420879 | KJ210539 | KJ420829 |
| <i>D. eres</i>           | AR5193= CBS 138594         | <i>Ulmus</i> Sp.             | <i>Ulmaceae</i>      | Germany     | R. Schumacher   | KJ420760           | KJ380958 | KJ434999 | KJ210550      | KJ381003 | KJ420850 | KJ210529 | KJ420799 |
|                          | AR5196 = CBS 138595        | <i>Ulmus</i> sp.             | <i>Ulmaceae</i>      | Germany     | R. Schumacher   | KJ420766           | KJ380932 | KJ435006 | KJ210554      | KJ381021 | KJ420866 | KJ210533 | KJ420817 |
|                          | DP0438                     | <i>Ulmus minor</i>           | <i>Ulmaceae</i>      | Austria     | W. Jaklitch     | KJ420765           | KJ380935 | KJ435016 | KJ210553      | KJ381020 | KJ420886 | KJ210532 | KJ420816 |
|                          | LCM114.01a= CBS 138598     | <i>Ulmus</i> sp.             | <i>Ulmaceae</i>      | USA         | L. Mejia        | KJ420754           | KJ380919 | KJ435027 | KJ210545      | KJ380988 | KJ420837 | KJ210521 | KJ420787 |
|                          | LCM114.01b                 | <i>Ulmus</i> sp.             | <i>Ulmaceae</i>      | USA         | L. Mejia        | KJ420754           | KJ380918 | KJ435026 | KJ210544      | KJ380987 | KJ420836 | KJ210520 | KJ420786 |
|                          | FAU483                     | <i>Malus</i> sp.             | <i>Rosaceae</i>      | Netherlands | F. A. Uecker    | JQ807326           | KJ380933 | KJ435022 | JQ807422      | KJ381031 | KJ420874 | KJ210537 | KJ420827 |
|                          | DAN001A =M1115             | <i>Daphne laureola</i>       | <i>Thaymeleaceae</i> | France      | unknown         | KJ420750           | KJ380914 | KJ434994 | KJ210540      | KJ380982 | KJ420831 | KJ210516 | KJ420781 |
|                          | DAN001B =M1116             | <i>Daphne laureola</i>       | <i>Thaymeleaceae</i> | France      | unknown         | KJ420751           | KJ380915 | KJ434995 | KJ210541      | KJ380983 | KJ420832 | KJ210517 | KJ420782 |
|                          | AR5197                     | <i>Rhododendron</i>          | <i>Ericaceae</i>     | Germany     | R.Schumacher    | KJ420764           | KJ380931 | KJ435014 | KJ210552      | KJ381016 | KJ420863 | KJ210531 | KJ420812 |
|                          | CBS 439.82                 | <i>Cotoneaster</i> sp.       | <i>Rosaceae</i>      | UK          | H. Butin        | KC843231           | KJ380920 | JX197429 | GQ250341      | KJ380989 | KC343574 | FJ889450 | JX275437 |
|                          | AR3519                     | <i>Corylus avellana</i>      | <i>Betulaceae</i>    | Austria     | W. Jaklitsch    | KJ420758           | KJ380922 | KJ435008 | KJ210547      | KJ380991 | KJ420839 | KJ210523 | KJ420789 |
|                          | FAU506                     | <i>Cornus florida</i>        | <i>Cornaceae</i>     | USA         | F. A. Uecker    | JQ807328           | KJ380925 | KJ435012 | JQ807403      | KJ380994 | KJ420842 | KJ210526 | KJ420792 |
|                          | FAU570                     | <i>Oxydendrum arboreum</i>   | <i>Ericaceae</i>     | USA         | F. A. Uecker    | JQ807335           | KJ380926 | KJ435025 | JQ807410      | KJ380996 | KJ420844 | KJ210527 | KJ420794 |
|                          | AR3723                     | <i>Rubus fruticosus</i>      | <i>Rosaceae</i>      | Austria     | W. Jaklitsch    | JQ807273           | KJ380941 | KJ435024 | JQ807354      | KJ380995 | KJ420843 | JQ807428 | KJ420793 |
|                          | FAU522                     | <i>Sassafras albida</i>      | <i>Lauraceae</i>     | USA         | F. A. Uecker    | JQ807331           | KJ380924 | KJ435010 | JQ807406      | KJ380993 | KJ420841 | KJ210525 | KJ420791 |
|                          | DP0666                     | <i>Juglans cinerea</i>       | <i>Juglandaceae</i>  | USA         | S. Anagnostakis | KJ420756           | KJ380921 | KJ435007 | KJ210546      | KJ380990 | KJ420838 | KJ210522 | KJ420788 |

|  |                                 |                                  |                          |          |                 |          |          |          |          |          |          |          |          |
|--|---------------------------------|----------------------------------|--------------------------|----------|-----------------|----------|----------|----------|----------|----------|----------|----------|----------|
|  | DP0667<br>=CBS 135428           | <i>Juglans cinerea</i>           | <i>Juglandaceae</i>      | USA      | S. Anagnostakis | KC843232 | KJ380923 | KC843155 | KC843121 | KJ380992 | KJ420840 | KC843328 | KC843229 |
|  | AR3560                          | <i>Viburnum</i> sp.              | <i>Adoxaceae</i>         | Austria  | W. Jaklitch     | JQ807270 | KJ380939 | KJ435011 | JQ807351 | KJ380998 | KJ420846 | JQ807425 | KJ420795 |
|  | AR5224                          | <i>Hedera helix</i>              | <i>Araliaceae</i>        | Germany  | R. Schumacher   | KJ420763 | KJ380961 | KJ435036 | KJ210551 | KJ381006 | KJ420853 | KJ210530 | KJ420802 |
|  | AR5231                          | <i>Hedera helix</i>              | <i>Araliaceae</i>        | Germany  | R. Schumacher   | KJ420767 | KJ380936 | KJ435038 | KJ210555 | KJ381022 | KJ420867 | KJ210534 | KJ420818 |
|  | AR5223=<br>CBS 138599           | <i>Acer nugundo</i>              | <i>Sapindaceae</i>       | Germany  | R. Schumacher   | KJ420759 | KJ380938 | KJ435000 | KJ210549 | KJ380997 | KJ420845 | KJ210528 | KJ420830 |
|  | CBS 109767<br>=AR3538           | <i>Acer</i> sp.                  | <i>Sapindaceae</i>       | Austria  | W. Jaklitsch    | JQ807294 | KJ380940 | KC343317 | KC343801 | JF319006 | KC343559 | DQ491514 | KC344043 |
|  |                                 |                                  |                          |          |                 |          |          |          |          |          |          |          |          |
|  | DLR12A<br>=M1117= CBS<br>138597 | <i>Vitis vinifera</i>            | <i>Vitaceae</i>          | France   | L. Phillipe     | KJ420752 | KJ380916 | KJ434996 | KJ210542 | KJ380984 | KJ420833 | KJ210518 | KJ420783 |
|  | DLR12B<br>=M1118                | <i>Vitis vinifera</i>            | <i>Vitaceae</i>          | France   | L. Phillipe     | KJ420753 | KJ380917 | KJ434997 | KJ210543 | KJ380985 | KJ420834 | KJ210519 | KJ420784 |
|  | AR4347                          | <i>Vitis vinifera</i>            | <i>Vitaceae</i>          | Korea    | S.K. Hong       | JQ807275 | KJ380929 | KJ435030 | JQ807356 | KJ381009 | KJ420856 | JQ807430 | KJ420805 |
|  | Di-C005/1                       | <i>Hydrangea<br/>macrophylla</i> | <i>Hydrangacea<br/>e</i> | Portugal | J. M. Santos    | -        | -        | -        | GQ250334 | -        | -        | GQ250203 | -        |
|  | Di-C005/2                       | <i>Hydrangea<br/>macrophylla</i> | <i>Hydrangacea<br/>e</i> | Portugal | J. M. Santos    | -        | -        | -        | GQ250335 | -        | -        | GQ250204 | -        |
|  | Di-C005/3                       | <i>Hydrangea<br/>macrophylla</i> | <i>Hydrangacea<br/>e</i> | Portugal | J. M. Santos    | -        | -        | -        | GQ250336 | -        | -        | GQ250205 | -        |
|  | Di-C005/4                       | <i>Hydrangea<br/>macrophylla</i> | <i>Hydrangacea<br/>e</i> | Portugal | J. M. Santos    | -        | -        | -        | GQ250342 | -        | -        | GQ250208 | -        |
|  | Di-C005/5                       | <i>Hydrangea<br/>macrophylla</i> | <i>Hydrangacea<br/>e</i> | Portugal | J. M. Santos    | -        | -        | -        | GQ250343 | -        | -        | GQ250209 | -        |
|  | Di-C005/6                       | <i>Hydrangea<br/>macrophylla</i> | <i>Hydrangacea<br/>e</i> | Portugal | J. M. Santos    | -        | -        | -        | GQ250344 | -        | -        | GQ250210 | -        |
|  | Di-C005/7                       | <i>Hydrangea<br/>macrophylla</i> | <i>Hydrangacea<br/>e</i> | Portugal | J. M. Santos    | -        | -        | -        | GQ250345 | -        | -        | GQ250211 | -        |
|  | Di-C005/8                       | <i>Hydrangea<br/>macrophylla</i> | <i>Hydrangacea<br/>e</i> | Portugal | J. M. Santos    | -        | -        | -        | GQ250337 | -        | -        | GQ250206 | -        |
|  | Di-C005/9                       | <i>Hydrangea<br/>macrophylla</i> | <i>Hydrangacea<br/>e</i> | Portugal | J. M. Santos    | -        | -        | -        | GQ250346 | -        | -        | GQ250212 | -        |
|  | Di-C005/10                      | <i>Hydrangea<br/>macrophylla</i> | <i>Hydrangacea<br/>e</i> | Portugal | J. M. Santos    | -        | -        | -        | GQ250347 | -        | -        | GQ250213 | -        |
|  | AR4355                          | <i>Prunus</i> sp.                | <i>Rosaceae</i>          | Korea    | S. K. Hong      | JQ807278 | KJ380942 | KJ435035 | JQ807359 | KJ381001 | KJ420848 | JQ807433 | KJ420797 |
|  | AR4367                          | <i>Prunus</i> sp.                | <i>Rosaceae</i>          | Korea    | S. K. Hong      | JQ807283 | KJ380962 | KJ435019 | JQ807364 | KJ381029 | KJ420873 | JQ807438 | KJ420824 |
|  | AR4346                          | <i>Prunus mume</i>               | <i>Rosaceae</i>          | Korea    | S. K. Hong      | JQ807274 | KJ380955 | KJ435003 | JQ807355 | KJ381027 | KJ420872 | JQ807429 | KJ420823 |
|  | AR4348                          | <i>Prunus persici</i>            | <i>Rosaceae</i>          | Korea    | S. K. Hong      | JQ807276 | KJ380952 | KJ435004 | JQ807357 | KJ381015 | KJ420862 | JQ807431 | KJ420811 |
|  | AR3669=<br>MAFF 625029          | <i>Pyrus pyrifolia</i>           | <i>Rosaceae</i>          | Japan    | S. Kanematsu    | JQ807340 | KJ380930 | KJ435002 | JQ807415 | KJ381012 | KJ420859 | JQ807466 | KJ420808 |
|  | AR3670 =<br>MAFF 625030         | <i>Pyrus pyrifolia</i>           | <i>Rosaceae</i>          | Japan    | S. Kanematsu    | JQ807341 | KJ380950 | KJ435001 | JQ807416 | KJ381011 | KJ420858 | JQ807467 | KJ420807 |
|  | AR3671=MAF                      | <i>Pyrus pyrifolia</i>           | <i>Rosaceae</i>          | Japan    | S. Kanematsu    | JQ807342 | KJ380954 | KJ435017 | JQ807417 | KJ381018 | KJ420865 | JQ807468 | KJ420814 |

|                     |                             |                                   |                     |             |               |          |          |          |          |          |          |                    |          |
|---------------------|-----------------------------|-----------------------------------|---------------------|-------------|---------------|----------|----------|----------|----------|----------|----------|--------------------|----------|
|                     | F 625033                    |                                   |                     |             |               |          |          |          |          |          |          |                    |          |
|                     | AR3672=<br>MAFF 625034      | <i>Pyrus pyrifolia</i>            | <i>Rosaceae</i>     | Japan       | S. Kanematsu  | JQ807343 | KJ380937 | KJ435023 | JQ807418 | KJ381023 | KJ420868 | JQ807469           | KJ420819 |
|                     | DP0177                      | <i>Pyrus pyrifolia</i>            | <i>Rosaceae</i>     | New Zealand | W. Kandula    | JQ807304 | KJ380945 | KJ435041 | JQ807381 | KJ381024 | KJ420869 | JQ807450           | KJ420820 |
|                     | DP0591                      | <i>Pyrus pyrifolia</i>            | <i>Rosaceae</i>     | New Zealand | W. Kandula    | JQ807319 | KJ380946 | KJ435018 | JQ807395 | KJ381025 | KJ420870 | JQ807465           | KJ420821 |
|                     | AR4369                      | <i>Pyrus pyrifolia</i>            | <i>Rosaceae</i>     | Korea       | S. K. Hong    | JQ807285 | KJ380953 | KJ435005 | JQ807366 | KJ381017 | KJ420864 | JQ807440           | KJ420813 |
|                     | DP0180                      | <i>Pyrus pyrifolia</i>            | <i>Rosaceae</i>     | New Zealand | W. Kandula    | JQ807307 | KJ380928 | KJ435029 | JQ807384 | KJ381008 | KJ420855 | JQ807453           | KJ420804 |
|                     | DP0179                      | <i>Pyrus pyrifolia</i>            | <i>Rosaceae</i>     | New Zealand | W. Kandula    | JQ807306 | KJ380944 | KJ435028 | JQ807383 | KJ381007 | KJ420854 | JQ807452           | KJ420803 |
|                     | DP0590                      | <i>Pyrus pyrifolia</i>            | <i>Rosaceae</i>     | New Zealand | W. Kndula     | JQ807318 | KJ380951 | KJ435037 | JQ807394 | KJ381014 | KJ420861 | JQ807464           | KJ420810 |
|                     | AR4373                      | <i>Ziziphus jujuba</i>            | <i>Rhamnaceae</i>   | Korea       | S. K. Hong    | JQ807287 | KJ380957 | KJ435013 | JQ807368 | KJ381002 | KJ420849 | JQ807442           | KJ420798 |
|                     | AR4374                      | <i>Ziziphus jujuba</i>            | <i>Rhamnaceae</i>   | Korea       | S. K. Hong    | JQ807288 | KJ380943 | KJ434998 | JQ807369 | KJ380986 | KJ420835 | JQ807443           | KJ420785 |
|                     | AR4357                      | <i>Ziziphus jujuba</i>            | <i>Rhamnaceae</i>   | Korea       | S. K. Hong    | JQ807279 | KJ380949 | KJ435031 | JQ807360 | KJ381010 | KJ420857 | JQ807434           | KJ420806 |
|                     | AR4371                      | <i>Malus pumila</i>               | <i>Rosaceae</i>     | Korea       | S. K. Hong    | JQ807286 | KJ380927 | KJ435034 | JQ807367 | KJ381000 | KJ420847 | JQ807441           | KJ420796 |
|                     | FAU532                      | <i>Chamaecyparis<br/>thyoides</i> | <i>Cupressaceae</i> | USA         | F. A. Uecker  | JQ807333 | KJ380934 | KJ435015 | JQ807408 | KJ381019 | KJ420885 | JQ807333           | KJ420815 |
|                     | CBS113470                   | <i>Castanea sativa</i>            | <i>Fagaceae</i>     | Australia   | K.A. Seifert  | KJ420768 | KJ380956 | KC343388 | KC343872 | KJ381028 | KC343630 | KC343146           | KC344114 |
|                     | AR4349                      | <i>Vitis vinifera</i>             | <i>Vitaceae</i>     | Korea       | S.K. Hong     | JQ807277 | KJ380947 | KJ435032 | JQ807358 | KJ381026 | KJ420871 | JQ807432           | KJ420822 |
|                     | AR4363                      | <i>Malus sp.</i>                  | <i>Rosaceae</i>     | Korea       | S. K Hong     | JQ807281 | KJ380948 | KJ435033 | JQ807362 | KJ381013 | KJ420860 | JQ807436           | KJ420809 |
|                     | DNP128<br>(=BYD1,M111<br>9) | <i>Castaneae<br/>mollissimae</i>  | <i>Fagaceae</i>     | China       | S.X. Jiang    | KJ420762 | KJ380960 | KJ435040 | KJ210561 | KJ381005 | KJ420852 | JF957786           | KJ420801 |
|                     | DNP129<br>(=BYD2,<br>M1120) | <i>Castaneae<br/>mollissimae</i>  | <i>Fagaceae</i>     | China       | S.X. Jiang    | KJ420761 | KJ380959 | KJ435039 | KJ210560 | KJ381004 | KJ420851 | JQ619886           | KJ420800 |
|                     | CBS 587.79                  | <i>Pinus pantepella</i>           | <i>Pinaceae</i>     | Japan       | G. H. Boerema | KJ420770 | KJ380975 | KC343395 | KC343879 | KJ381030 | KC343637 | KC343153           | KC344121 |
| <i>D. helioides</i> | AR5211= CBS<br>138596       | <i>Hedera helix</i>               | <i>Araliaceae</i>   | France      | A. Gardiennet | KJ420772 | KJ380977 | KJ435043 | KJ210559 | KJ381043 | KJ420875 | KJ210538           | KJ420828 |
| <i>D. neilliae</i>  | CBS 144. 27                 | <i>Spiraea sp.</i>                | <i>Rosaceae</i>     | USA         | L.E. Wehmeyer | KJ420780 | KJ380973 | KC343386 | KC343870 | KJ381046 | KC343628 | KC343144           | KC344112 |
| <i>D. pulla</i>     | CBS 338.89                  | <i>Hedera helix</i>               | <i>Araliaceae</i>   | Yugoslavia  | M. Cevetcovic | KJ420773 | KJ380978 | KC343394 | KC343878 | KJ381044 | KC343636 | KC343152           | KC344120 |
| <i>D. vaccinii</i>  | CBS 135436<br>=DF5032       | <i>Vaccinium<br/>corymbosum</i>   | <i>Ericaceae</i>    | USA         | D.F. Farr     | JQ807303 | KJ380964 | KC849457 | JQ807380 | KJ381032 | KJ420877 | AF317570           | KC843225 |
|                     | FAU633                      | <i>Vaccinium<br/>macrocarpon</i>  | <i>Ericaceae</i>    | USA         | F. A. Uecker  | JQ807338 | KJ380966 | KC849456 | JQ807413 | KJ381034 | KJ420878 | U11360,U1<br>1414  | KC843226 |
|                     | FAU446                      | <i>Vaccinium<br/>macrocarpon</i>  | <i>Ericaceae</i>    | USA         | F. Caruso     | JQ807322 | KJ380967 | KC849455 | JQ807398 | KJ381035 | KJ420882 | U11317,U1<br>1367  | KC843224 |
|                     | CBS 160.32                  | <i>Vaccinium<br/>macrocarpon</i>  | <i>Ericaceae</i>    | USA         | C. Shear      | JQ807297 | KJ380968 | KC343470 | GQ250326 | KJ381036 | KC343712 | AF317578           | JX270436 |
|                     | FAU 468                     | <i>Vaccinium<br/>macrocarpon</i>  | <i>Ericaceae</i>    | USA         | F. A. Uecker  | JQ807323 | KJ380965 | KC849458 | JQ807399 | KJ381033 | KJ420876 | U113327,U<br>11377 | KC843227 |
